1           **Causal associations between female reproductive behaviors and**  
2           **psychiatric disorders: a lifecourse Mendelian randomization study**

3    Yifan Yu<sup>1,2□</sup>, MS; Lei Hou<sup>1,2□</sup>, MS; Yutong Wu<sup>1,2</sup>, MS; Yuanyuan Yu<sup>1,2</sup>, PhD;  
4    Xinhui Liu<sup>1,2</sup>, MS; Sijia Wu<sup>1,2</sup>, MS; Yina He<sup>1,2</sup>, MS; Yilei Ge<sup>1,2</sup>, MS; Yun Wei<sup>1,2</sup>, MS;  
5    Fengtong Qian<sup>1,2</sup>, MS; Qingxin Luo<sup>1,2</sup>, MS; Yue Feng<sup>1,2</sup>, MS; Xiaojing Cheng<sup>3</sup>, MS;  
6    Tiangui Yu<sup>3\*</sup>, PhD; Hongkai Li<sup>1,2\*</sup>, PhD; Fuzhong Xue<sup>1,2,3\*</sup>, PhD;

7

8    **Author affiliations:**

- 9    1. Department of Epidemiology and Health Statistics, School of Public Health,  
10    Cheeloo College of Medicine, Shandong University, Jinan, People's Republic of  
11    China
- 12    2. Institute for Medical Dataology, Cheeloo College of Medicine, Shandong  
13    University, Jinan, People's Republic of China
- 14    3. Qilu Hospital, Cheeloo College of Medicine, Shandong University, Jinan, People's  
15    Republic of China
- 16    4. Shandong Mental Health Center, Jinan, People's Republic of China

17

18    **\* Corresponding author:**

- 19    1. Fuzhong Xue, E-mail: [xuefzh@sdu.edu.cn](mailto:xuefzh@sdu.edu.cn), Telephone: 13906405997,  
20                                    Address: School of public health, Shandong University, 44 Wenhua  
21                                    West Road, Jinan, Shandong province, China
- 22    2. Hongkai Li, E-mail: [lihongkaiyouxiang@163.com](mailto:lihongkaiyouxiang@163.com), Telephone: 18310601363,  
23                                    Address: School of public health, Shandong University, 44 Wenhua West Road,  
24                                    Jinan, Shandong province, China
- 25    3. Tiangui Yu, E-mail: [sdyutg@163.com](mailto:sdyutg@163.com),  
26                                    Address: Shandong Mental Health Center, Jinan, Shandong province, China

27

28 □ These authors contributed equally to this work.

29 \* These authors also contributed equally to this work.

30 word count: 3616

31

32 **Abstract**

33 **Background:** The timings of reproductive life events have been examined to be  
34 associated with various psychiatric disorders. However, studies have not considered  
35 the causal pathways from reproductive behaviors to different psychiatric disorders.  
36 This study aimed to investigate the nature of the relationships between five  
37 reproductive behaviors and twelve psychiatric disorders.

38 **Methods:** Firstly, we calculated genetic correlations between reproductive factors and  
39 psychiatric disorders. Then two-sample Mendelian randomization (MR) was  
40 conducted to estimate the causal associations among five reproductive behaviors, and  
41 these reproductive behaviors on twelve psychiatric disorders, using genome-wide  
42 association study (GWAS) summary data from genetic consortia. Multivariable MR  
43 was then applied to evaluate the direct effect of reproductive behaviors on these  
44 psychiatric disorders whilst accounting for other reproductive factors at different life  
45 periods.

46 **Results:** Univariable MR analyses provide evidences that age at menarche, age at first  
47 sexual intercourse and age at first birth have effects on one (depression), seven  
48 (anxiety disorder, ADHD, bipolar disorder, bipolar disorder II, depression, PTSD and  
49 schizophrenia) and three psychiatric disorders (ADHD, depression and PTSD) (based  
50 on  $p < 7.14 \times 10^{-4}$ ), respectively. However, after performing multivariable MR,  
51 only age at first sexual intercourse has direct effects on six psychiatric disorders  
52 (Depression, Attention deficit or hyperactivity disorder, Bipolar disorder,  
53 Posttraumatic stress disorder, Anxiety disorders and Anorexia Nervosa) when  
54 accounting for other reproductive behaviors with significant effects in univariable  
55 analyses.

56 **Conclusion:** Our findings suggest that reproductive behaviors predominantly exert  
57 their detrimental effects on psychiatric disorders and age at first sexual intercourse has  
58 direct effects on psychiatric disorders.

59

60 **Key words:** reproductive behaviors, psychiatric disorders, genetic correlation,  
61 mendelian randomization

62

## 63 **1 Background**

64 Psychiatric disorders have become the major contributors to overall morbidity and  
65 disability across the globe [1]. Approximately 30% of individuals suffer from  
66 psychiatric disorders across the lifespan [2] and the causes of psychiatric disorders  
67 may be different at different stages of life. Since psychiatric disorder is one of the  
68 leading cause of disease burdens, it is necessary to identify potential risk factors for  
69 further prevention [3].

70 Female reproductive behaviors, including age at menarche, age at first sexual  
71 intercourse, age at first birth, age at last birth and age at menopause, have important  
72 implications in reproductive health and evolutionary fitness. Some of these  
73 reproductive behaviors have been identified as risk factors for various psychiatric  
74 disorders [4-6], such as depression, schizophrenia [7] and bipolar disorders [8].  
75 Taking depression as an example, multiple studies in the past decade have examined  
76 the association between age of menarche and risk of depression in adolescent girls  
77 and adulthood [9-13]. For instance, a mendelian randomization analysis showed early  
78 menarche is associated with higher levels of depressive symptoms at 14 years old [11].  
79 Other studies have implicated early age at first sexual intercourse and early age at first  
80 birth were risk factors of depression [14-17]. A recent study used the National  
81 Longitudinal Study of Adolescent Health dataset to show earlier age of first coitus  
82 was associated with depressive symptoms [14].

83 However, the potential role of a woman's reproductive behaviors in the causal  
84 pathways between reproductive behaviors and psychiatric disorders from the  
85 perspective of the whole life-course remains unclear. Whether an individual can  
86 reverse the impact of age of early reproductive behaviors (such as menarche) on  
87 psychiatric disorders through lifestyle modifications is unclear, particularly as those  
88 who had smaller age at menarche tend to have smaller ages at other reproductive  
89 behaviors than normal people [18-22]. For example, a meta-analysis study showed  
90 that early menarche increases the risk of premature and early menopause by 80% [20].  
91 This makes it challenging to distinguish whether reproductive behaviors in early life  
92 have independent and lasting effects on psychiatric disorders, or whether its effects  
93 are completely mediated by other reproductive behaviors in later years. If the latter is  
94 the case, then it is possible to avoid the potential adverse consequences of earlier

95 reproductive behaviors by attaining a different reproductive lifestyle in the later years.

96 Mendelian randomization (MR) is an approach that can deal with these  
97 challenges by using genetic variants as instrumental variables (IV) to infer causality  
98 among correlated traits. A valid IV must satisfy the following three assumptions: 1)  
99 Relevance: IV is robustly related to the exposure; 2) Exchangeability: IV is  
100 independent of any confounders of the exposure and outcome relationship; and 3)  
101 Exclusion restriction: IV affects the outcome only through the exposure [23]. The  
102 advantage of MR is that it could eliminate the impact of confounding and reverse  
103 causality compared with traditional regression analysis [24-25]. In addition,  
104 multivariable MR is recently developed to determine whether an exposure affects the  
105 outcome under the condition of other exposures [26] which makes it possible to  
106 explore the causal pathways between the psychiatric disorder and reproductive  
107 behaviors.

108 In this MR study, we evaluated causal relationships between the five  
109 reproductive behaviors based on their temporal order, and explored whether  
110 genetically predicted reproductive behaviors have effects on twelve psychiatric  
111 disorders, using genome-wide association studies (GWAS) summary data of  
112 reproductive behaviors and psychiatric disorders on large sample populations that are  
113 publicly available. For psychiatric disorders with strong evidence of genetically  
114 predicted effects with multiple reproductive behaviors, we applied multivariable MR  
115 to examine evidences of direct or indirect effects by accounting for reproductive  
116 behaviors with significant effects.

## 117 **2 Methods**

### 118 **2.1 Data sources**

#### 119 *Reproductive factors*

120 The reproductive factors investigated in this study includes age at menarche (AAM),  
121 age at first sexual intercourse (AFS), age at first birth (AFB), age at last birth (ALB)  
122 and age at menopause (ANM). GWAS summary statistics for age of menarche [27]  
123 and menopause [28] were from ReproGen consortium, including 252,000 and 201,323  
124 participants respectively. For AFS and AFB, we used the summary statistics from the  
125 GWAS meta-analysis of 36 cohorts by Day *et al.* [29] study, including 542,901 and  
126 418,758 individuals respectively. GWAS summary statistics for ALB were from UK

127 Biobank cohort [30] with the sample size of 170,248. These reproductive factors were  
128 restricted in European ancestry. Details for datasets are listed in Table 1. We selected  
129 SNPs at a GWAS threshold of statistical significance with  $p < 5 \times 10^{-8}$  and linkage  
130 disequilibrium (LD)  $r^2 < 0.001(10000kb)$ . The F-statistics of all reproductive  
131 factors were larger than 10 (Table 2), which means that these IVs strongly predict the  
132 traits [23]. Thus, it is sufficient to generate a strong genetic instrument based on the  
133 selected SNPs.

#### 134 *Psychiatric disorders*

135 The GWAS summary data for psychiatric disorders were retrieved from the  
136 Psychiatric Genomes Consortium (PGC). We chose 12 related psychiatric disorders as  
137 the outcome, including anxiety disorders (33,640 cases/43,456 controls) [31],  
138 anorexia nervosa (14,477 samples) [32], attention deficit or hyperactivity disorder  
139 (4,945 cases/16,246 controls) [33], autism spectrum disorder (18,382 cases/27,969  
140 controls) [34], bipolar disorder (41,917 cases/371,549 controls) and two BD subtypes:  
141 bipolar I disorder (25,060 cases/449,978 controls) and bipolar II disorder (6,781  
142 cases/364,075 controls) [35], major depressive disorder (170,756 cases/329,443  
143 controls) [36], obsessive compulsive disorder (2,688 cases/7,037 controls) [37],  
144 posttraumatic stress disorder (23,185 cases/151,309 controls) [38], schizophrenia  
145 (67,280 cases/86,912 controls) [39] and Tourette syndrome (55,386 cases/77,258  
146 controls) [40]. Details for datasets are listed in Table 1. Ethical review and informed  
147 consent had been obtained in all of the original studies.

## 148 **2.2 Statistical analyses**

### 149 *Genetic Correlation*

150 We used high-definition likelihood (HDL) inference for genetic correlation analysis.  
151 Compared with LD score regression (LDSC), HDL makes full use of the information  
152 of the variance-covariance matrix of the Z-score in GWAS summary statistics [41].  
153 The reference panel used in HDL is 1000 Genomes phase 3 European reference panel.

### 154 *Univariable MR*

155 To access the causal associations between reproductive factors and psychiatric  
156 disorders, we used “TwosampleMR” R package for MR analysis [42,43]. The inverse  
157 variance weighted (IVW) method [23,44] was conducted as our primary MR method  
158 to access the causal associations of reproductive behaviors in pairs, along with

159 reproductive behaviors and psychiatric disorders. We applied a conservative  
160 Bonferroni correction (i.e.  $p < 0.05/70 = 7.14 \times 10^{-4}$ ) as a strong evidence and a  
161 nominal threshold (i.e.  $p < 0.05$ ) as a weak evidence of causal relationship. We  
162 supplemented MR-Egger regression [45], weighted median [46], weighted mode [47],  
163 MR-robust adjusted profile score (MR-RAPS) [48] and MR-Mix methods [49] as our  
164 sensitivity MR analyses, which make different assumptions based on different  
165 effectiveness of the SNPs. The results from multiple methods of MR are helpful to  
166 evaluate the robustness of our MR estimations. The intercept of MR-Egger regression  
167 shows the average pleiotropic effect among all used SNPs under the InSIDE  
168 (Instrument Strength Independent of Direct Effect) assumption and a non-zero  
169 intercept means there exists directional pleiotropy. Additionally, we used applied  
170 MR-PRESSO (Mendelian Randomization Pleiotropy RESidual Sum and Outlier) [50]  
171 to identify and remove potential outliers. Egger's test is used for pleiotropy test.  
172 Heterogeneity tests include two methods: IVW and MR-Egger.

### 173 ***Multivariable MR***

174 Multivariable MR based on IVW method was subsequently applied in a two-sample  
175 setting. This statistical method is suitable for considering the genetically predicted  
176 effects of multiple risk factors (e.g. age at menarche and age at menopause) on an  
177 outcome (e.g. depression) simultaneously. This enables us to estimate the direct  
178 effects of a reproductive behavior in early life (i.e. the effect of age at menarche after  
179 accounting for age at menopause) and indirect effects (i.e. the effect mediated by age  
180 at menopause) on a psychiatric disorder. We applied this model using all genetic  
181 variants for the reproductive factors, which have nominal significant ( $p < 0.05$ )  
182 causal effects on outcomes, after undertaking linkage disequilibrium clumping based  
183 on  $r^2 < 0.001$  to ensure independence of our instruments. The statistical analyses of  
184 multivariable MR were performed using R package "MVMR" [51].

## 185 **3 Results**

### 186 **3.1 Genetic Correlation**

187 Among all the genetic correlation analyses between reproductive factors and  
188 psychiatric disorders, there were 26 pairs of traits had significant genetic correlations  
189 ( $r_g$  range:  $|0.07 - 0.69|$ ) under a conservative Bonferroni correction ( $p <$   
190  $0.05/60 = 8.33 \times 10^{-4}$ ) and another 9 pairs of traits had nominal significant genetic

191 correlations under  $p < 0.05$ . Results are shown in Figure 1. Age of first sexual  
192 intercourse had the highest genetic correlations with all psychiatric disorders except  
193 autism spectrum disorder and Tourette syndrome, while age at menarche only had  
194 strong evidence of genetic correlation with depression. Among all psychiatric  
195 disorders, depression had evidence of genetic correlation with all reproductive factors  
196 (a weak evidence with menopause and strong evidence with other four traits), while  
197 there was null genetic correlation between Tourette syndrome and reproductive  
198 factors.

199 [Please insert Figure 1 here]

### 200 **3.2 Causal relationships among reproductive factors**

#### 201 ***Univariable MR***

202 Results of univariable MR among reproductive factors are shown in Figure 2. The  
203 results of IVW method suggested that negative genetic correlation reflected causal  
204 effects of 190 SNPs determined later age at menarche (1 SD increase) on later AFS  
205 (  $b = 0.07$ ; 95% confidence interval (CI) = 0.05,0.10 ), AFB (  $b = 0.17$ ; CI =  
206 0.09,0.25), ALB (  $b = 0.05$ ; CI = 0.02,0.07) and ANM (  $b = 0.14$ ; CI = 0.03,0.24)  
207 under Bonferroni-adjusted level of significance ( $p < 7.14 \times 10^{-4}$ ). Results revealed  
208 that 194 SNPs determined later age at first sexual intercourse (1 SD increase) might  
209 lead to later AFB (  $b = 2.11$ ; CI = 1.96,2.27), ALB (  $b = 0.43$ ; CI = 0.37,0.48) and  
210 ANM (  $b = 0.49$ ; CI = 0.19,0.79). For later age at first birth, its one SD increase led  
211 to later ALB (  $b = 0.19$ ; CI = 0.17,0.20) and ANM (  $b = 0.15$ ; CI = 0.05,0.26), using  
212 65 SNPs as IVs. In addition, 6 SNPs determined age at last birth had no evidence of  
213 causal effect to ANM. These results were supported by weighted median, MR-RAPS  
214 methods (Figure S1) and MR PRESSO (Figure S2), suggesting the results were robust.  
215 In the results of ME PRESSO, we didn't present the situation that outlier was not  
216 found. All the information of IVs were listed in Table S1. Egger's test did not provide  
217 evidence that horizontal pleiotropy was driving these effects (Table S2). There is no  
218 heterogeneity in the Wald Ratio of all IVs (Table S3).

219 [Please insert Figure 2 here]

#### 220 ***Multivariable MR***

221 Results of multivariable MR were shown in Figure 3. Results suggested that only AFS  
222 had significant causal effect on AFB (  $b = 2.11$ ; CI = 1.93,2.29), while AAM had no



223 direct effects on AFB. After adjusting for AAM and AFS, AFB had significant direct  
224 effect on ALB ( $b = 0.19$ ;  $CI = 0.17, 0.27$ ). We also found only AAM had positive  
225 causal effect on ANM ( $b = 0.11$ ;  $CI = 0.01, 0.21$ ), while AFS and AFB had no direct  
226 effects on ANM.

227 [Please insert Figure 3 here]

### 228 **3.3 Causal relationships between reproductive factors and psychiatric disorders**

#### 229 *Age at menarche*

230 MR findings (Figure 2) from the primary analysis suggested that the negative genetic  
231 correlation reflects a causal relationship between later age at menarche (1 SD increase)  
232 and lower risk of depression ( $OR = 0.96$ ;  $CI = 0.93, 0.98$ ) under Bonferroni-adjusted  
233 level of significance ( $p < 7.14 \times 10^{-4}$ ). Results of weighted median and MR-RAPS  
234 methods were consistent with this result (Figure S3). Egger's test did not provide  
235 evidence that horizontal pleiotropy (Table S4). Heterogeneity existed in the Wald  
236 Ratio of age at menarche and ADHD (Table S5). After removing outliers, MR  
237 PRESSO revealed that the later age at menarche reduced the risk of the ADHD  
238 ( $OR = 0.84$ ;  $CI = 0.72, 0.98$ ) (Figure S4).

#### 239 *Age at first sexual intercourse*

240 Results revealed that later age at first sexual intercourse (1 SD increase) may lead to  
241 lower risk of anxiety disorder ( $OR = 0.46$ ;  $CI = 0.33, 0.64$ ), lower risk of ADHD  
242 ( $OR = 0.17$ ;  $CI = 0.12, 0.25$ ), bipolar disorder ( $OR = 0.66$ ;  $CI = 0.55, 0.79$ ), bipolar  
243 II disorder ( $OR = 0.58$ ;  $CI = 0.43, 0.79$ ), depression ( $OR = 0.67$ ;  $CI = 0.62, 0.74$ ),  
244 posttraumatic stress disorder ( $OR = 0.57$ ;  $CI = 0.47, 0.69$ ) and schizophrenia  
245 ( $OR = 0.54$ ;  $CI = 0.43, 0.69$ ). Although heterogeneity existed in several relationships  
246 (Table S5), these causal results were consistent with the results of weighted median,  
247 MR-RAPS methods (Figure S5) and MR PRESSO (Figure S6). Egger's test did not  
248 provide evidence that horizontal pleiotropy (Table S4).

#### 249 *Age at first birth*

250 We found that later age at first birth (1 SD increase) may lead to lower risk of ADHD  
251 ( $OR = 0.69$ ;  $CI = 0.60, 0.79$ ), depression ( $OR = 0.87$ ;  $CI = 0.84, 0.90$ ) and  
252 posttraumatic stress disorder ( $OR = 0.85$ ;  $CI = 0.79, 0.92$ ). Results of weighted  
253 median and MR-RAPS methods were consistent with these results (Figure S7).  
254 Egger's test did not provide evidence that horizontal pleiotropy (Table S4). There

255 existed heterogeneity in the Wald Ratio of age at first birth and Bipolar disorder  
256 (Table S5). After removing outliers, MR PRESSO revealed that the later age at first  
257 birth reduced the risk of the Bipolar disorder (OR = 0.89; CI = 0.82,0.96) (Figure S8).

### 258 ***Age at last birth***

259 MR results suggested that age at last birth had no evidence of causal effect to  
260 psychiatric disorders at Bonferroni-adjusted level of significance, but only nominal  
261 significant of later age at last birth (1 SD increase) lead to lower risk of depression  
262 ( $p = 0.003$ ; OR = 0.65). Although heterogeneity existed in several relationships  
263 (Table S5), these causal results were consistent with the results of weighted median,  
264 MR-RAPS methods (Figure S9) and MR PRESSO (Figure S10). Egger's test did not  
265 provide evidence that horizontal pleiotropy (Table S4).

### 266 ***Age at menopause***

267 There was no evidence of causal effect of age at menopause on psychiatric disorders  
268 at Bonferroni-adjusted level of significance, but only nominal significant of later age  
269 at menopause (1 SD increase) lead to higher risk of anorexia nervosa  
270 ( $p = 0.02$ ; OR = 1.04) and anxiety disorders ( $p = 0.02$ ; OR = 1.04). Results of  
271 weighted median and MR-RAPS methods were consistent with these results (Figure  
272 S11). Egger's test did not provide evidence that horizontal pleiotropy (Table S4).  
273 There existed heterogeneity in the Wald Ratio of age at menopause and Bipolar  
274 disorder (Table S5). After removing outliers, MR PRESSO revealed that the later age  
275 at menopause increased the risk of the Bipolar disorder (OR = 1.017; CI =  
276 1.002,1.033) (Figure S12).

### 277 ***Multivariable MR***

278 We used multivariable MR to evaluate the direct effects of multiple reproductive  
279 factors on the psychiatric disorders, resulted in the majority of effect estimates  
280 identified in the previous univariable analysis attenuating to include the null upon  
281 adjustment for other reproductive factors that had significant causal effect to the  
282 outcome ( $p < 0.05$ ). Results were shown in Figure 4.

283 [Please insert Figure 4 here]

284 We found that only AFS had significant causal effect to depression (OR =  
285 0.75; CI = 0.67,0.85), while AAM, AFB and ALB had no direct effects to depression;  
286 only AFS had significant causal effect to PTSD (OR = 0.61; CI = 0.43,0.85), while  
287 AFB had no direct effect; only AFS had significant causal effect to ADHD (OR =

288 0.21; CI = 0.10,0.41), while AAM and AFB had no direct effects; only ANM had  
289 significant causal effect to anxiety disorders (OR = 1.04; CI = 1.00,1.08), while AFS  
290 and AFB had no direct effects; AFS and ANM both had significant direct effects to  
291 anorexia nervosa ( OR = 2.00; CI = 1.38,2.90 for AFS and OR = 1.04; CI =  
292 1.00,1.07 for ANM); neither reproductive factor had significant causal effect to  
293 bipolar II disorder.

294 This indicates that evidence of the total effects between AAM and ADHD and  
295 depression detected in the univariable analysis may due to the long-term effects of the  
296 earlier reproductive behavior across the life course (i.e. not just age at menarche). The  
297 evidence of the effect between AFS and anxiety disorder is likely totally mediated by  
298 ANM. The evidence of the effects between AFB and depression, PTSD, ADHD and  
299 anxiety disorder were likely confounded by AFS, suggesting there was no causal  
300 relations between AFB and these psychiatric disorders. The evidence of the effects  
301 between ALB and depression, ADHD and anxiety disorder were likely also  
302 confounded by AFS, suggesting there was no causal relations between AFB and these  
303 psychiatric disorders. Figure 5 is the causal graph that shows where we found  
304 evidence of an effect between reproductive behaviors and psychiatric disorders.

305 [Please insert Figure 5 here]

#### 306 **4 Discussion**

307 We present evidence suggesting causal effects of several female reproductive  
308 behaviors on other reproductive traits. On the other hand, we show that later age of  
309 reproductive behaviors across the life course decreases the risk of psychiatric  
310 disorders, while later age at menopause increases the risk of anorexia nervosa and  
311 anxiety disorders. However, these effects estimation attenuated once accounting for  
312 other reproductive behaviors of different stages of life. On the one hand, these effects  
313 may be explained by the sustained impact of earlier sexual maturity in childhood and  
314 thus tend to remain so into adulthood. On the other hand, impact of common cause  
315 (i.e. reproductive factor during early life) is also important, and it has causal effects to  
316 both reproductive factors during adulthood and psychiatric disorders.

317 We corroborate the direct effects of age at menarche on AFS and age at  
318 menopause in previous studies [18,19,52,53], while showing the effects of age at  
319 menarche on AFB and ALB are totally mediated by AFS and AFB, respectively. Our

320 study also supports positive causal links between AFS and AFB, AFB and ALB  
321 [21,53,54]. We show that earlier reproductive behaviors including age at menarche,  
322 AFS and AFB have effects on subsequent reproductive events through two main  
323 pathways: (i) the directed path from age at menarche to age at menopause; (ii) the  
324 pathway from age at menarche to ALB through AFS and AFB. Our findings suggest  
325 that for reproductive behaviors except age at menopause, an earlier reproductive  
326 behavior only have direct causal effect on the next reproductive behavior following  
327 the temporal order; and the age at menopause only affected by age at menarche. These  
328 findings oppose previous MR studies that supported causal effects between AFS and  
329 age at menopause or AFB and age at menopause [53,55-59].

330 For the causal relations between reproductive behaviors and psychiatric disorders,  
331 our study supports evidence for the earlier of age of reproductive behaviors in early  
332 life are causal factors in the rising risks of psychiatric disorders in previous studies  
333 [4-17]. However, the none effects of age at menarche, AFB and ALB after accounting  
334 for AFS using multivariable MR suggest that the effect of age at menarche on  
335 depression is totally mediated by AFS and the effects of AFB and ALB on psychiatric  
336 disorders are confounded by AFS. Our findings show that AFS is a direct risk factor  
337 on the pathway from reproductive behaviors to multiple psychiatric disorders, which  
338 has sustained impact on both reproductive behaviors and psychiatric disorders. The  
339 multivariable MR estimates for reproductive behaviors illustrate the importance of  
340 using a lifecourse MR approach to separate the effects of reproductive behaviors at  
341 separate stages in the life course [60-62].

342 One explanation for why earlier reproductive behaviors lead to earlier  
343 subsequent reproductive behaviors and psychiatric disorders is the life history theory.  
344 The core idea of this theory is to allocate limited resources between reproductive  
345 efforts and human growth, which can be divided into ‘fast’ and ‘slow’ life history  
346 strategies [63,64]. A ‘fast’ life history strategy makes more direct efforts to reproduce,  
347 such as earlier sexual intercourse which may lead to an earlier age of first birth, while  
348 people with a ‘slow’ life history strategy have later puberty and make a greater  
349 investment in a smaller number of offspring [63,64]. This theory is also supported by  
350 our study by showing that the women with an earlier age at menarche would have an  
351 earlier age at first sexual intercourse and earlier age at first birth [65]. On the other  
352 hand, women with a ‘fast’ life history may experience earlier age at menopause

353 because of the huge resources on reproductive efforts in early life and the  
354 completeness of reproduction at a younger age [66,67], which is also supported by  
355 our results that earlier age at menarche leads to earlier age at menopause and earlier  
356 AFB leads to earlier ALB. Besides the age of reproductive behavior, life history  
357 theory can also explain the association between reproductive behaviors and  
358 psychiatric disorders. Life history theory explains the difference between ‘fast’ and  
359 ‘slow’ strategy as an adaptive response to an individual’s developmental environments  
360 and adverse childhood experiences have been shown to associate with earlier AFS,  
361 which has been identified as a risk factor for depression symptoms [68-70]. The ‘fast’  
362 strategy in modern environments of earlier AFS is associated with teenage pregnancy  
363 and risk behaviors like violence, criminality, and substance abuse because of the little  
364 knowledge of reproductive health and these risk behaviors have been shown to be risk  
365 factors of multiple psychiatric disorders [71-73]. Our findings suggest that for  
366 preventing psychiatric disorders, it is important to control the age of first sexual  
367 intercourse rather than other reproductive behaviors like age at menarche by  
368 increasing sex education and parental monitoring.

369 Our research has various strengths and limitations. Firstly, we used data from  
370 large meta-analyzed sample of PGC consortia and ReproGen consortium, whose  
371 sample size is larger than any other studies before. On the other hand, the MR  
372 framework allowed us to avoid the effects of unmeasured confounders and reverse  
373 causation compared to more traditional epidemiology approaches [74] and the  
374 sensitive analysis of MR allowed us to evaluate the strong assumptions of MR.  
375 Furthermore, we used multivariable MR to investigate the causal pathways from five  
376 reproductive behaviors to twelve psychiatric disorders, which shows whether women  
377 with earlier menarche and first sexual intercourse could reduce the risk of psychiatric  
378 disorders by attaining a normal sexual lifestyle in later life. Conversely, one of the  
379 main limitations of our study is that all participants were of European descent.  
380 Therefore, it is not clear whether our findings are applicable to other ethnicities or  
381 populations of different ages, and further study needs to be discussed using samples  
382 from other ancestry groups or age groups [75-78]. In addition, the GWAS of the age  
383 of reproductive behaviors were derived from recall data with the possibility of recall  
384 bias, especially for reproductive behaviors during early life such as age at menarche  
385 and age at first sexual intercourse [75,76]. Another limitation of our study is that the

386 ages of some important reproductive events are not included in our study such as the  
387 age of some reproductive diseases or the age at abortion.

## 388 **5 Conclusion**

389 In conclusion, our present lifecourse Mendelian randomization study provided  
390 evidence of causal relationships between five reproductive behaviors and twelve  
391 psychiatric disorders. In particular, we find strong evidence of the effects of  
392 reproductive behaviors on psychiatric disorders, and the importance of implementing  
393 preventative policies to control the age at first sexual intercourse in young age and its  
394 subsequent influence on the rising numbers of psychiatric disorders. This will help  
395 ease healthcare burdens and potentially improve the quality of life for individuals  
396 living with psychiatric disorders.

397

398

399 **Declarations**

400 **Acknowledgement**

401 We want to acknowledge the participants and investigators of the UK Biobank,  
402 MRC-IEU, ReproGen, PGC and MR base consortium.

403 **Conflict of interest disclosure**

404 The authors declared no potential conflicts of interest with respect to the research,  
405 authorship and/or publication of this article.

406 **Funding statement**

407 HL was supported by the National Natural Science Foundation of China (Grant  
408 82003557) and Shandong Province Key R&D Program Project (2021SFGC0504). FX  
409 was supported by the National Natural Science Foundation of China (Grant  
410 82173625).

411 **Data availability statement**

412 All the GWAS summary data are publicly available. GWAS summary data for  
413 reproductive behaviors can be download at MR base (<https://www.mrbase.org/>).  
414 GWAS summary data for psychiatric disorders can be download at PGC consortium  
415 (<https://pgc.unc.edu/>).

416 **Ethics approval and patient consent statement**

417 Ethical approval was not sought, because this study involved analysis of publicly  
418 available summary-level data from GWASs, and no individual-level data were used.

419 **Author contributions**

420 FX, HL and TY conceived the study. YW, YY and SW contributed to data collection.  
421 YY, XL, YH, YG and YW contributed to the data analysis and sensitivity analyses.  
422 LH, FQ, QL and YF contributed to results collation and plot figures. YY, LH, XC, TY,  
423 HL and FX wrote and modified the manuscript. All authors reviewed and approved  
424 the final manuscript.

425

426

427 **Reference**

- 428 [1] Baingana F, Al’Absi M, Becker A, Pringle B. Global research challenges and  
429 opportunities for mental health and substance-use disorders. *Nature*.  
430 2015;527(7578):S172–7.
- 431 [2] Kessler R, Demler O, Frank R, Olfson M, Pincus H, Walters E, et al. Prevalence  
432 and treatment of mental disorders, 1990 to 2003. *N Engl J Med*.  
433 2005;352(24):2515–23.
- 434 [3] Vigo D, Thornicroft G, Atun R. Estimating the true global burden of mental  
435 illness. *Lancet Psychiatry*. 2016;3(2):171–8.
- 436 [4] Ni G, Amare AT, Zhou X, Mills N, Gratten J, Lee SH. The genetic relationship  
437 between female reproductive traits and six psychiatric disorders. *Sci Rep*. 2019  
438 Aug 19;9(1):12041. doi: 10.1038/s41598-019-48403-x. PMID: 31427629;  
439 PMCID: PMC6700195.
- 440 [5] Cai J, Wei Z, Chen M, He L, Wang H, Li M, Peng Y. Socioeconomic status,  
441 individual behaviors and risk for mental disorders: A Mendelian randomization  
442 study. *Eur Psychiatry*. 2022 Apr 18;65(1):e28. doi: 10.1192/j.eurpsy.2022.18.  
443 PMID: 35431011; PMCID: PMC9158396.
- 444 [6] Ohi K, Kuramitsu A, Fujikane D, Takai K, Sugiyama S, Shioiri T. Shared genetic  
445 basis between reproductive behaviors and anxiety-related disorders. *Mol*  
446 *Psychiatry*. 2022 Jun 24. doi: 10.1038/s41380-022-01667-8. Epub ahead of print.  
447 PMID: 35750798.
- 448 [7] Lawn RB, Sallis HM, Taylor AE, Wootton RE, Smith GD, Davies NM, Hemani G,  
449 Fraser A, Penton-Voak IS, Munafò MR. Schizophrenia risk and reproductive  
450 success: a Mendelian randomization study. *R Soc Open Sci*. 2019 Mar  
451 6;6(3):181049. doi: 10.1098/rsos.181049. PMID: 31031992; PMCID:  
452 PMC6458425.
- 453 [8] Yazici E, Bursalioglu FS, Aydin N, Yazici AB. Menarche, puberty and psychiatric  
454 disorders. *Gynecol Endocrinol*. 2013 Dec;29(12):1055-8. doi:  
455 10.3109/09513590.2013.829447. Epub 2013 Aug 23. PMID: 23968160.
- 456 [9] Chan YM, Feld A, Jonsdottir-Lewis E. Effects of the Timing of Sex-Steroid  
457 Exposure in Adolescence on Adult Health Outcomes. *J Clin Endocrinol Metab*.  
458 2019 Oct 1;104(10):4578-4586. doi: 10.1210/jc.2019-00569. PMID: 31194243;



- 459           PMCID: PMC6736212.
- 460   [10]Shen Y, Varma DS, Zheng Y, Boc J, Hu H. Age at menarche and depression:  
461        results from the NHANES 2005-2016. *PeerJ*. 2019 Jun 13;7:e7150. doi:  
462        10.7717/peerj.7150. PMID: 31223544; PMCID: PMC6571127.
- 463   [11]Sequeira ME, Lewis SJ, Bonilla C, Smith GD, Joinson C. Association of timing  
464        of menarche with depressive symptoms and depression in adolescence:  
465        Mendelian randomisation study. *Br J Psychiatry*. 2017 Jan;210(1):39-46. doi:  
466        10.1192/bjp.bp.115.168617. Epub 2016 Aug 4. PMID: 27491534; PMCID:  
467        PMC5209630.
- 468   [12]Mendle J, Ryan RM, McKone KMP. Age at Menarche, Depression, and  
469        Antisocial Behavior in Adulthood. *Pediatrics*. 2018 Jan;141(1):e20171703. doi:  
470        10.1542/peds.2017-1703. PMID: 29279324; PMCID: PMC5744273.
- 471   [13]Opoliner A, Carwile JL, Blacker D, Fitzmaurice GM, Austin SB. Early and late  
472        menarche and risk of depressive symptoms in young adulthood. *Arch Womens  
473        Ment Health*. 2014 Dec;17(6):511-8. doi: 10.1007/s00737-014-0435-6. Epub  
474        2014 Jul 22. PMID: 25048175; PMCID: PMC4742523.
- 475   [14]Jamieson LK, Wade TJ. Early age of first sexual intercourse and depressive  
476        symptomatology among adolescents. *J Sex Res*. 2011 Sep;48(5):450-60. doi:  
477        10.1080/00224499.2010.509892. Epub 2011 May 24. PMID: 20845208.
- 478   [15]Lara LAS, Abdo CHN. Age at Time of Initial Sexual Intercourse and Health of  
479        Adolescent Girls. *J Pediatr Adolesc Gynecol*. 2016 Oct;29(5):417-423. doi:  
480        10.1016/j.jpag.2015.11.012. Epub 2015 Dec 2. PMID: 26655691.
- 481   [16]Mirowsky J, Ross CE. Depression, parenthood, and age at first birth. *Soc Sci  
482        Med*. 2002 Apr;54(8):1281-98. doi: 10.1016/s0277-9536(01)00096-x. PMID:  
483        11989963.
- 484   [17]Carlson DL. Explaining the curvilinear relationship between age at first birth and  
485        depression among women. *Soc Sci Med*. 2011 Feb;72(4):494-503. doi:  
486        10.1016/j.socscimed.2010.12.001. Epub 2010 Dec 15. PMID: 21216058.
- 487   [18]Hardy R, Kuh D. Reproductive characteristics and the age at inception of the  
488        perimenopause in a British National Cohort. *Am J Epidemiol*. 1999 Apr  
489        1;149(7):612-20. doi: 10.1093/oxfordjournals.aje.a009861. PMID: 10192308.
- 490   [19]Henderson KD, Bernstein L, Henderson B, Kolonel L, Pike MC. Predictors of the  
491        timing of natural menopause in the Multiethnic Cohort Study. *Am J Epidemiol*.

- 492 2008 Jun 1;167(11):1287-94. doi: 10.1093/aje/kwn046. Epub 2008 Mar 21.  
493 PMID: 18359953.
- 494 [20]Mishra GD, Pandeya N, Dobson AJ, Chung HF, Anderson D, Kuh D, Sandin S,  
495 Giles GG, Bruinsma F, Hayashi K, Lee JS, Mizunuma H, Cade JE, Burley V,  
496 Greenwood DC, Goodman A, Simonsen MK, Adami HO, Demakakos P,  
497 Weiderpass E. Early menarche, nulliparity and the risk for premature and early  
498 natural menopause. *Hum Reprod.* 2017 Mar 1;32(3):679-686. doi:  
499 10.1093/humrep/dew350. PMID: 28119483; PMCID: PMC5850221.
- 500 [21]Sandler DP, Wilcox AJ, Horney LF. Age at menarche and subsequent  
501 reproductive events. *Am J Epidemiol.* 1984 May;119(5):765-74. doi:  
502 10.1093/oxfordjournals.aje.a113797. PMID: 6720673.
- 503 [22]Marino JL, Skinner SR, Doherty DA, Rosenthal SL, Cooper Robbins SC, Cannon  
504 J, Hickey M. Age at menarche and age at first sexual intercourse: a prospective  
505 cohort study. *Pediatrics.* 2013 Dec;132(6):1028-36. doi: 10.1542/peds.2012-3634.  
506 Epub 2013 Nov 11. PMID: 24218473.
- 507 [23]Burgess S, Small DS, Thompson SG. A review of instrumental variable  
508 estimators for Mendelian randomization. *Stat Methods Med Res.* 2017  
509 Oct;26(5):2333-2355. doi: 10.1177/0962280215597579. Epub 2015 Aug 17.  
510 PMID: 26282889; PMCID: PMC5642006.
- 511 [24]Smith GD, Ebrahim S. 'Mendelian randomization': can genetic epidemiology  
512 contribute to understanding environmental determinants of disease? *Int J*  
513 *Epidemiol.* 2003 Feb;32(1):1-22. doi: 10.1093/ije/dyg070. PMID: 12689998.
- 514 [25]Davey Smith G, Hemani G. Mendelian randomization: genetic anchors for causal  
515 inference in epidemiological studies. *Hum Mol Genet.* 2014 Sep  
516 15;23(R1):R89-98. doi: 10.1093/hmg/ddu328. Epub 2014 Jul 4. PMID: 25064373;  
517 PMCID: PMC4170722.
- 518 [26]Burgess S, Thompson SG. Multivariable Mendelian randomization: the use of  
519 pleiotropic genetic variants to estimate causal effects. *Am J Epidemiol.* 2015 Feb  
520 15;181(4):251-60. doi: 10.1093/aje/kwu283. Epub 2015 Jan 27. PMID: 25632051;  
521 PMCID: PMC4325677.
- 522 [27]Day FR, Thompson DJ, et al. Genomic analyses identify hundreds of variants  
523 associated with age at menarche and support a role for puberty timing in cancer  
524 risk. *Nat Genet.* 2017 Jun;49(6):834-841. doi: 10.1038/ng.3841. Epub 2017 Apr

- 525 24. PMID: 28436984; PMCID: PMC5841952.
- 526 [28]Ruth KS, Day FR, et al. Genetic insights into biological mechanisms governing  
527 human ovarian ageing. *Nature*. 2021 Aug;596(7872):393-397. doi:  
528 10.1038/s41586-021-03779-7. Epub 2021 Aug 4. PMID: 34349265; PMCID:  
529 PMC7611832.
- 530 [29]Mills MC, Tropf FC, et al. Identification of 371 genetic variants for age at first  
531 sex and birth linked to externalising behaviour. *Nat Hum Behav*. 2021  
532 Dec;5(12):1717-1730. doi: 10.1038/s41562-021-01135-3. Epub 2021 Jul 1.  
533 Erratum in: *Nat Hum Behav*. 2021 Jul 28;: PMID: 34211149; PMCID:  
534 PMC7612120.
- 535 [30]Sudlow C, Gallacher J, et al. UK biobank: an open access resource for identifying  
536 the causes of a wide range of complex diseases of middle and old age. *PLoS Med*.  
537 2015 Mar 31;12(3):e1001779. doi: 10.1371/journal.pmed.1001779. PMID:  
538 25826379; PMCID: PMC4380465.
- 539 [31]Forstner AJ, Awasthi S, Wolf C, et al. Genome-wide association study of panic  
540 disorder reveals genetic overlap with neuroticism and depression. *Mol Psychiatry*.  
541 2021 Aug;26(8):4179-4190. doi: 10.1038/s41380-019-0590-2. Epub 2019 Nov 11.  
542 PMID: 31712720.
- 543 [32]Duncan L, Yilmaz Z, et al. Significant Locus and Metabolic Genetic Correlations  
544 Revealed in Genome-Wide Association Study of Anorexia Nervosa. *Am J*  
545 *Psychiatry*. 2017 Sep 1;174(9):850-858. doi: 10.1176/appi.ajp.2017.16121402.  
546 Epub 2017 May 12. PMID: 28494655; PMCID: PMC5581217.
- 547 [33]Demontis, D., Walters, R.K., Martin, J. et al. Discovery of the first genome-wide  
548 significant risk loci for attention deficit/hyperactivity disorder. *Nat Genet* 51,  
549 63–75 (2019).
- 550 [34]Grove J, Ripke S, et al. Identification of common genetic risk variants for autism  
551 spectrum disorder. *Nat Genet*. 2019 Mar;51(3):431-444. doi:  
552 10.1038/s41588-019-0344-8. Epub 2019 Feb 25. PMID: 30804558; PMCID:  
553 PMC6454898.
- 554 [35]Mullins N, Forstner AJ, et al. Genome-wide association study of more than  
555 40,000 bipolar disorder cases provides new insights into the underlying biology.  
556 *Nat Genet*. 2021 Jun;53(6):817-829. doi: 10.1038/s41588-021-00857-4. Epub  
557 2021 May 17. PMID: 34002096; PMCID: PMC8192451.

- 558 [36]Howard DM, Adams MJ, et al. Genome-wide meta-analysis of depression  
559 identifies 102 independent variants and highlights the importance of the  
560 prefrontal brain regions. *Nat Neurosci.* 2019 Mar;22(3):343-352. doi:  
561 10.1038/s41593-018-0326-7. Epub 2019 Feb 4. PMID: 30718901; PMCID:  
562 PMC6522363.
- 563 [37]International Obsessive Compulsive Disorder Foundation Genetics Collaborative  
564 (IOCDF-GC) and OCD Collaborative Genetics Association Studies (OC GAS).  
565 Revealing the complex genetic architecture of obsessive-compulsive disorder  
566 using meta-analysis. *Mol Psychiatry.* 2018 May;23(5):1181-1188. doi:  
567 10.1038/mp.2017.154. Epub 2017 Aug 1. PMID: 28761083; PMCID:  
568 PMC6660151.
- 569 [38]Nievergelt CM, Maihofer AX, et al. International meta-analysis of PTSD  
570 genome-wide association studies identifies sex- and ancestry-specific genetic risk  
571 loci. *Nat Commun.* 2019 Oct 8;10(1):4558. doi: 10.1038/s41467-019-12576-w.  
572 PMID: 31594949; PMCID: PMC6783435.
- 573 [39]Trubetskoy V, Pardiñas AF, et al. Mapping genomic loci implicates genes and  
574 synaptic biology in schizophrenia. *Nature.* 2022 Apr;604(7906):502-508. doi:  
575 10.1038/s41586-022-04434-5. Epub 2022 Apr 8. PMID: 35396580; PMCID:  
576 PMC9392466.
- 577 [40]Yu D, Sul JH, Tsetsos F, et al. Interrogating the Genetic Determinants of  
578 Tourette's Syndrome and Other Tic Disorders Through Genome-Wide Association  
579 Studies. *Am J Psychiatry.* 2019 Mar 1;176(3):217-227. doi:  
580 10.1176/appi.ajp.2018.18070857. PMID: 30818990; PMCID: PMC6677250.
- 581 [41]Ning Z, Pawitan Y, Shen X. High-definition likelihood inference of genetic  
582 correlations across human complex traits. *Nat Genet.* 2020 Aug;52(8):859-864.  
583 doi: 10.1038/s41588-020-0653-y. Epub 2020 Jun 29. PMID: 32601477.
- 584 [42]Hemani G, Zheng J, et al. The MR-Base platform supports systematic causal  
585 inference across the human phenome. *eLife.* 2018;7:e34408. doi:  
586 10.7554/eLife.34408.
- 587 [43]Hemani G, Tilling K, Davey Smith G. Orienting the causal relationship between  
588 imprecisely measured traits using GWAS summary data. *PLOS Genetics.* 2017;  
589 13(11): e1007081. <https://doi.org/10.1371/journal.pgen.1007081>
- 590 [44]Hou L, Li H, Si S, Yu Y, Sun X, Liu X, et al. Exploring the causal pathway from

- 591 bilirubin to CVD and diabetes in the UK biobank cohort study: observational  
592 findings and Mendelian randomization studies. *Atherosclerosis* 2021;320:112-21.
- 593 [45]Bowden J, Davey Smith G, Burgess S. Mendelian randomization with invalid  
594 instruments: effect estimation and bias detection through Egger regression. *Int J*  
595 *Epidemiol.* 2015 Apr;44(2):512-25. doi: 10.1093/ije/dyv080. Epub 2015 Jun 6.  
596 PMID: 26050253; PMCID: PMC4469799.
- 597 [46]Bowden J, Davey Smith G, Haycock PC, Burgess S. Consistent Estimation in  
598 Mendelian Randomization with Some Invalid Instruments Using a Weighted  
599 Median Estimator. *Genet Epidemiol.* 2016 May;40(4):304-14. doi:  
600 10.1002/gepi.21965. Epub 2016 Apr 7. PMID: 27061298; PMCID:  
601 PMC4849733.
- 602 [47]Hartwig FP, Davey Smith G, Bowden J. Robust inference in summary data  
603 Mendelian randomization via the zero modal pleiotropy assumption. *Int J*  
604 *Epidemiol.* 2017 Dec 1;46(6):1985-1998. doi: 10.1093/ije/dyx102. PMID:  
605 29040600; PMCID: PMC5837715.
- 606 [48]Zhao Q , Wang J , Hemani G , et al. Statistical inference in two-sample  
607 summary-data Mendelian randomization using robust adjusted profile score. *The*  
608 *Annals of Statistics*, 2018, 48(3).
- 609 [49]Qi G, Chatterjee N. Mendelian randomization analysis using mixture models for  
610 robust and efficient estimation of causal effects. *Nat Commun.* 2019 Apr  
611 26;10(1):1941. doi: 10.1038/s41467-019-09432-2. PMID: 31028273; PMCID:  
612 PMC6486646.
- 613 [50]Verbanck M, Chen CY, Neale B, Do R. Detection of widespread horizontal  
614 pleiotropy in causal relationships inferred from Mendelian randomization  
615 between complex traits and diseases. *Nat Genet.* 2018 May;50(5):693-698. doi:  
616 10.1038/s41588-018-0099-7. Epub 2018 Apr 23. Erratum in: *Nat Genet.* 2018  
617 Aug;50(8):1196. PMID: 29686387; PMCID: PMC6083837.
- 618 [51]Sanderson E, Spiller W, Bowden J. Testing and correcting for weak and  
619 pleiotropic instruments in two-sample multivariable Mendelian randomization.  
620 *Stat Med.* 2021 Nov 10;40(25):5434-5452. doi: 10.1002/sim.9133. Epub 2021  
621 Aug 2. PMID: 34338327; PMCID: PMC9479726.
- 622 [52]Udry JR. Age at menarche, at first intercourse, and at first pregnancy. *J Biosoc*  
623 *Sci.* 1979 Oct;11(4):433-41. doi: 10.1017/s0021932000012517. PMID: 511871.

- 624 [53]Prince C, Sharp GC, Howe LD, Fraser A, Richmond RC. The relationships  
625 between women's reproductive factors: a Mendelian randomisation analysis.  
626 BMC Med. 2022 Mar 24;20(1):103. doi: 10.1186/s12916-022-02293-5. PMID:  
627 35321746; PMCID: PMC8944090.
- 628 [54]Lawn RB, Sallis HM, et al. The effects of age at menarche and first sexual  
629 intercourse on reproductive and behavioural outcomes: A Mendelian  
630 randomization study. PLoS One. 2020 Jun 15;15(6):e0234488. doi:  
631 10.1371/journal.pone.0234488. PMID: 32542040; PMCID: PMC7295202.
- 632 [55]van Keep PA, Brand PC, Lehert P. Factors affecting the age at menopause. J  
633 Biosoc Sci Suppl. 1979;(6):37-55. doi: 10.1017/s0021932000024299. PMID:  
634 293326.
- 635 [56]Boulet MJ, Oddens BJ, Lehert P, Vemer HM, Visser A. Climacteric and  
636 menopause in seven south-east Asian countries. Maturitas. 2008  
637 Sep-Oct;61(1-2):34-53. doi: 10.1016/j.maturitas.2008.09.008. PMID: 19434878.
- 638 [57]van Noord PA, Dubas JS, Dorland M, Boersma H, te Velde E. Age at natural  
639 menopause in a population-based screening cohort: the role of menarche,  
640 fecundity, and lifestyle factors. Fertil Steril. 1997 Jul;68(1):95-102. doi:  
641 10.1016/s0015-0282(97)81482-3. PMID: 9207591.
- 642 [58]Kato I, Toniolo P, Akhmedkhanov A, Koenig KL, Shore R, Zeleniuch-Jacquotte A.  
643 Prospective study of factors influencing the onset of natural menopause. J Clin  
644 Epidemiol. 1998 Dec;51(12):1271-6. doi: 10.1016/s0895-4356(98)00119-x.  
645 PMID: 10086819.
- 646 [59]Nagel G, Altenburg HP, Nieters A, Boffetta P, Linseisen J. Reproductive and  
647 dietary determinants of the age at menopause in EPIC-Heidelberg. Maturitas.  
648 2005 Nov-Dec;52(3-4):337-47. doi: 10.1016/j.maturitas.2005.05.013. Epub 2005  
649 Jul 11. PMID: 16011884.
- 650 [60]Richardson TG, Mykkänen J, Pahkala K, Ala-Korpela M, Bell JA, Taylor K,  
651 Viikari J, Lehtimäki T, Raitakari O, Davey Smith G. Evaluating the direct effects  
652 of childhood adiposity on adult systemic metabolism: a multivariable Mendelian  
653 randomization analysis. Int J Epidemiol. 2021 Nov 10;50(5):1580-1592. doi:  
654 10.1093/ije/dyab051. PMID: 33783488; PMCID: PMC8580280.
- 655 [61]Richardson TG, Crouch DJM, Power GM, Morales-Berstein F, Hazelwood E,  
656 Fang S, Cho Y, Inshaw JRJ, Robertson CC, Sidore C, Cucca F, Rich SS, Todd JA,

- 657 Davey Smith G. Childhood body size directly increases type 1 diabetes risk based  
658 on a lifecourse Mendelian randomization approach. *Nat Commun.* 2022 Apr  
659 28;13(1):2337. doi: 10.1038/s41467-022-29932-y. PMID: 35484151; PMCID:  
660 PMC9051135.
- 661 [62]Sanderson E, Richardson TG, Morris TT, Tilling K, Davey Smith G. Estimation  
662 of causal effects of a time-varying exposure at multiple time points through  
663 multivariable mendelian randomization. *PLoS Genet.* 2022 Jul  
664 18;18(7):e1010290. doi: 10.1371/journal.pgen.1010290. PMID: 35849575;  
665 PMCID: PMC9348730.
- 666 [63]Ellis BJ, Bjorklund DF. Beyond mental health: an evolutionary analysis of  
667 development under risky and supportive environmental conditions: an  
668 introduction to the special section. *Dev Psychol.* 2012 May;48(3):591-7. doi:  
669 10.1037/a0027651. PMID: 22545847.
- 670 [64]Ellis BJ. Timing of pubertal maturation in girls: an integrated life history  
671 approach. *Psychol Bull.* 2004 Nov;130(6):920-58. doi:  
672 10.1037/0033-2909.130.6.920. PMID: 15535743.
- 673 [65]Figueredo A J , G Vásquez, Brumbach B H , et al. The K-Factor: Individual  
674 differences in life history strategy. *Personality and Individual Differences*, 39(8),  
675 1349-1360[J]. *Personality and Individual Differences*, 2005, 39(8):1349-1360.
- 676 [66]Belsky J, Steinberg L, Draper P. Childhood experience, interpersonal  
677 development, and reproductive strategy: and evolutionary theory of socialization.  
678 *Child Dev.* 1991 Aug;62(4):647-70. doi: 10.1111/j.1467-8624.1991.tb01558.x.  
679 PMID: 1935336.
- 680 [67]James J, Ellis BJ, Schlomer GL, Garber J. Sex-specific pathways to early puberty,  
681 sexual debut, and sexual risk taking: tests of an integrated  
682 evolutionary-developmental model. *Dev Psychol.* 2012 May;48(3):687-702. doi:  
683 10.1037/a0026427. Epub 2012 Jan 23. PMID: 22268605.
- 684 [68]Stephenson R, Simon C, Finneran C. Community factors shaping early age at first  
685 sex among adolescents in Burkina Faso, Ghana, Malawi, and Uganda. *J Health  
686 Popul Nutr.* 2014 Jun;32(2):161-75. PMID: 25076654; PMCID: PMC4216953.
- 687 [69]Tilahun M, Ayele G. Factors associated with age at first sexual initiation among  
688 youths in Gamo Gofa, south west Ethiopia: a cross sectional study. *BMC Public  
689 Health.* 2013 Jul 2;13:622. doi: 10.1186/1471-2458-13-622. PMID: 23819567;

- 690           PMCID: PMC3729496.
- 691   [70]Hugo TD, Maier VT, Jansen K, Rodrigues CE, Cruzeiro AL, Ores Lda C,  
692       Pinheiro RT, Silva R, Souza LD. Fatores associados à idade da primeira relação  
693       sexual em jovens: estudo de base populacional [Factors associated with age at  
694       first intercourse: a population-based study]. *Cad Saude Publica*. 2011  
695       Nov;27(11):2207-14. Portuguese. doi: 10.1590/s0102-311x2011001100014.  
696       PMID: 22124498.
- 697   [71]Magnus MC, Anderson EL, Howe LD, Joinson CJ, Penton-Voak IS, Fraser A.  
698       Childhood psychosocial adversity and female reproductive timing: a cohort study  
699       of the ALSPAC mothers. *J Epidemiol Community Health*. 2018 Jan;72(1):34-40.  
700       doi: 10.1136/jech-2017-209488. Epub 2017 Nov 9. PMID: 29122994; PMCID:  
701       PMC5753025.
- 702   [72]Simpson JA, Griskevicius V, Kuo SI, Sung S, Collins WA. Evolution, stress, and  
703       sensitive periods: the influence of unpredictability in early versus late childhood  
704       on sex and risky behavior. *Dev Psychol*. 2012 May;48(3):674-86. doi:  
705       10.1037/a0027293. Epub 2012 Feb 13. PMID: 22329381.
- 706   [73]Hawes ZC, Wellings K, Stephenson J. First heterosexual intercourse in the United  
707       kingdom: a review of the literature. *J Sex Res*. 2010 Mar;47(2):137-52. doi:  
708       10.1080/00224490903509399. PMID: 20358457.
- 709   [74]Burgess S, Swanson SA, Labrecque JA. Are Mendelian randomization  
710       investigations immune from bias due to reverse causation? *Eur J Epidemiol*. 2021  
711       Mar;36(3):253-257. doi: 10.1007/s10654-021-00726-8. Epub 2021 Feb 21. PMID:  
712       33611685; PMCID: PMC8032609.
- 713   [75]Cooper R, Blell M, Hardy R, Black S, Pollard TM, Wadsworth ME, Pearce MS,  
714       Kuh D. Validity of age at menarche self-reported in adulthood. *J Epidemiol*  
715       *Community Health*. 2006 Nov;60(11):993-7. doi: 10.1136/jech.2005.043182.  
716       Erratum in: *J Epidemiol Community Health*. 2007 Feb;61(2):175. PMID:  
717       17053289; PMCID: PMC2465480.
- 718   [76]Graham CA, Catania JA, Brand R, Duong T, Canchola JA. Recalling sexual  
719       behavior: a methodological analysis of memory recall bias via interview using the  
720       diary as the gold standard. *J Sex Res*. 2003 Nov;40(4):325-32. doi:  
721       10.1080/00224490209552198. PMID: 14735406.
- 722   [77]Births by parents' characteristics, England and Wales. In. Office for National



723            Statistics: [www.ons.gov.uk](http://www.ons.gov.uk); 2019.

724    [78]Forman MR, Mangini LD, Thelus-Jean R, Hayward MD. Life-course origins of  
725            the ages at menarche and menopause. *Adolesc Health Med Ther*. 2013 Jan  
726            18;4:1-21. doi: 10.2147/AHMT.S15946. PMID: 24600293; PMCID:  
727            PMC3912848.

728

729 **Table 1.** Datasets

| Traits                                      | Consortium | Sample size<br>(cases/controls) | Year | Pubmed<br>ID |
|---------------------------------------------|------------|---------------------------------|------|--------------|
| menarche                                    | ReproGen   | 252000                          | 2014 | 28436984     |
| Age at first sexual intercourse             | -          | 397338                          | 2021 | 34211149     |
| Age at first birth                          | -          | 542901                          | 2021 | 34211149     |
| Age at last live birth                      | MRC-IEU    | 170248                          | 2018 | -            |
| menopause                                   | ReproGen   | 201323                          | 2015 | 34349265     |
| Autism spectrum disorder                    | PGC        | 46351(18382/27969)              | 2017 | 30804558     |
| Depression                                  | PGC        | 500199(170756/329443)           | 2019 | 30718901     |
| Attention deficit or hyperactivity disorder | PGC        | 21191(4945/16246)               | 2018 | 29325848     |
| Obsessive compulsive disorder               | PGC        | 9725(2688/7037)                 | 2017 | 28761083     |
| Schizophrenia                               | PGC        | 130644(53386/77258)             | 2022 | 35396580     |
| Bipolar disorder (all)                      | PGC        | 413466(41917/371549)            | 2021 | 34002096     |
| Bipolar disorder (I)                        | PGC        | 64802(25060/449978)             | 2021 | 34002096     |
| Bipolar disorder (II)                       | PGC        | 22560(6781/364075)              | 2021 | 34002096     |
| Posttraumatic stress disorder               | PGC        | 174659(23212/151447)            | 2019 | 31594949     |
| Anxiety disorders                           | PGC        | 77096(33640/43456)              | 2016 | 26754954     |
| Anorexia Nervosa                            | PGC        | 14477(3495/10982)               | 2017 | 28494655     |
| Tourette syndrome                           | PGC        | 14307(4819/9488)                | 2018 | 30818990     |

730

731 **Table 2.** F statistics of IVs for exposures

| Exposure                        | nSNPs | F statistics |
|---------------------------------|-------|--------------|
| menarche                        | 190   | 67.549       |
| menopause                       | 198   | 111.759      |
| Age at first sexual intercourse | 194   | 46.822       |
| Age at first birth              | 65    | 38.556       |
| Age at last live birth          | 6     | 130.993      |

732

733

734 **Figure legends**

735 **Figure 1.** Genetic correlations between reproductive factors and psychiatric disorders.

736 **Figure 2.** Univariable MR between reproductive factors and psychiatric disorders.

737 **Figure 3.** Multivariable MR among reproductive factors.

738 **Figure 4.** Multivariable MR between reproductive factors and psychiatric disorders.

739 **Figure 5.** Causal relationships between reproductive factors and psychiatric disorders.

740 The dashed lines represent the significant results in univariable MR but null

741 significant results in multivariable MR or nominal significant results in univariable

742 MR. The solid lines represent the significant results in both univariable and

743 multivariable MR. The green lines represent the negative effects. The yellow and blue

744 lines represent the positive effects. Psychiatric disorders with red color represent the

745 diseases considered in multivariable MR analysis.

746

# Multivariable MR

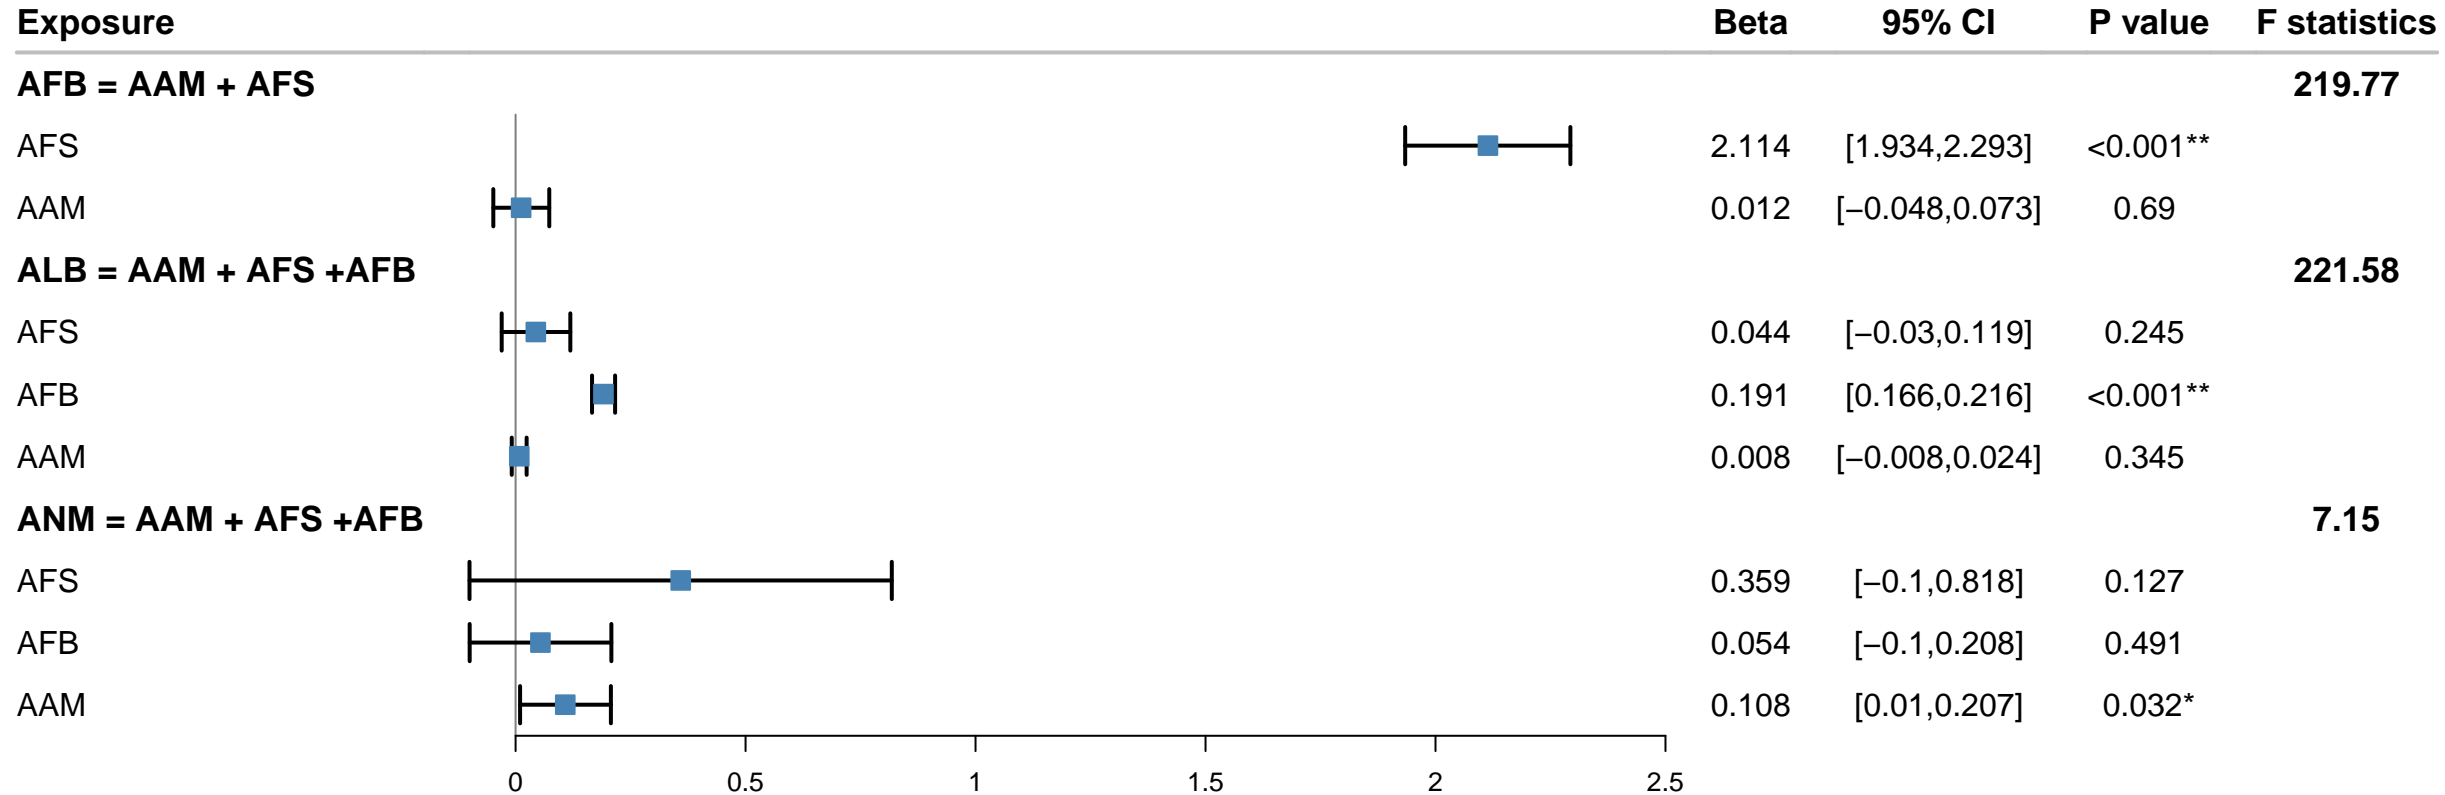

# Multivariable MR

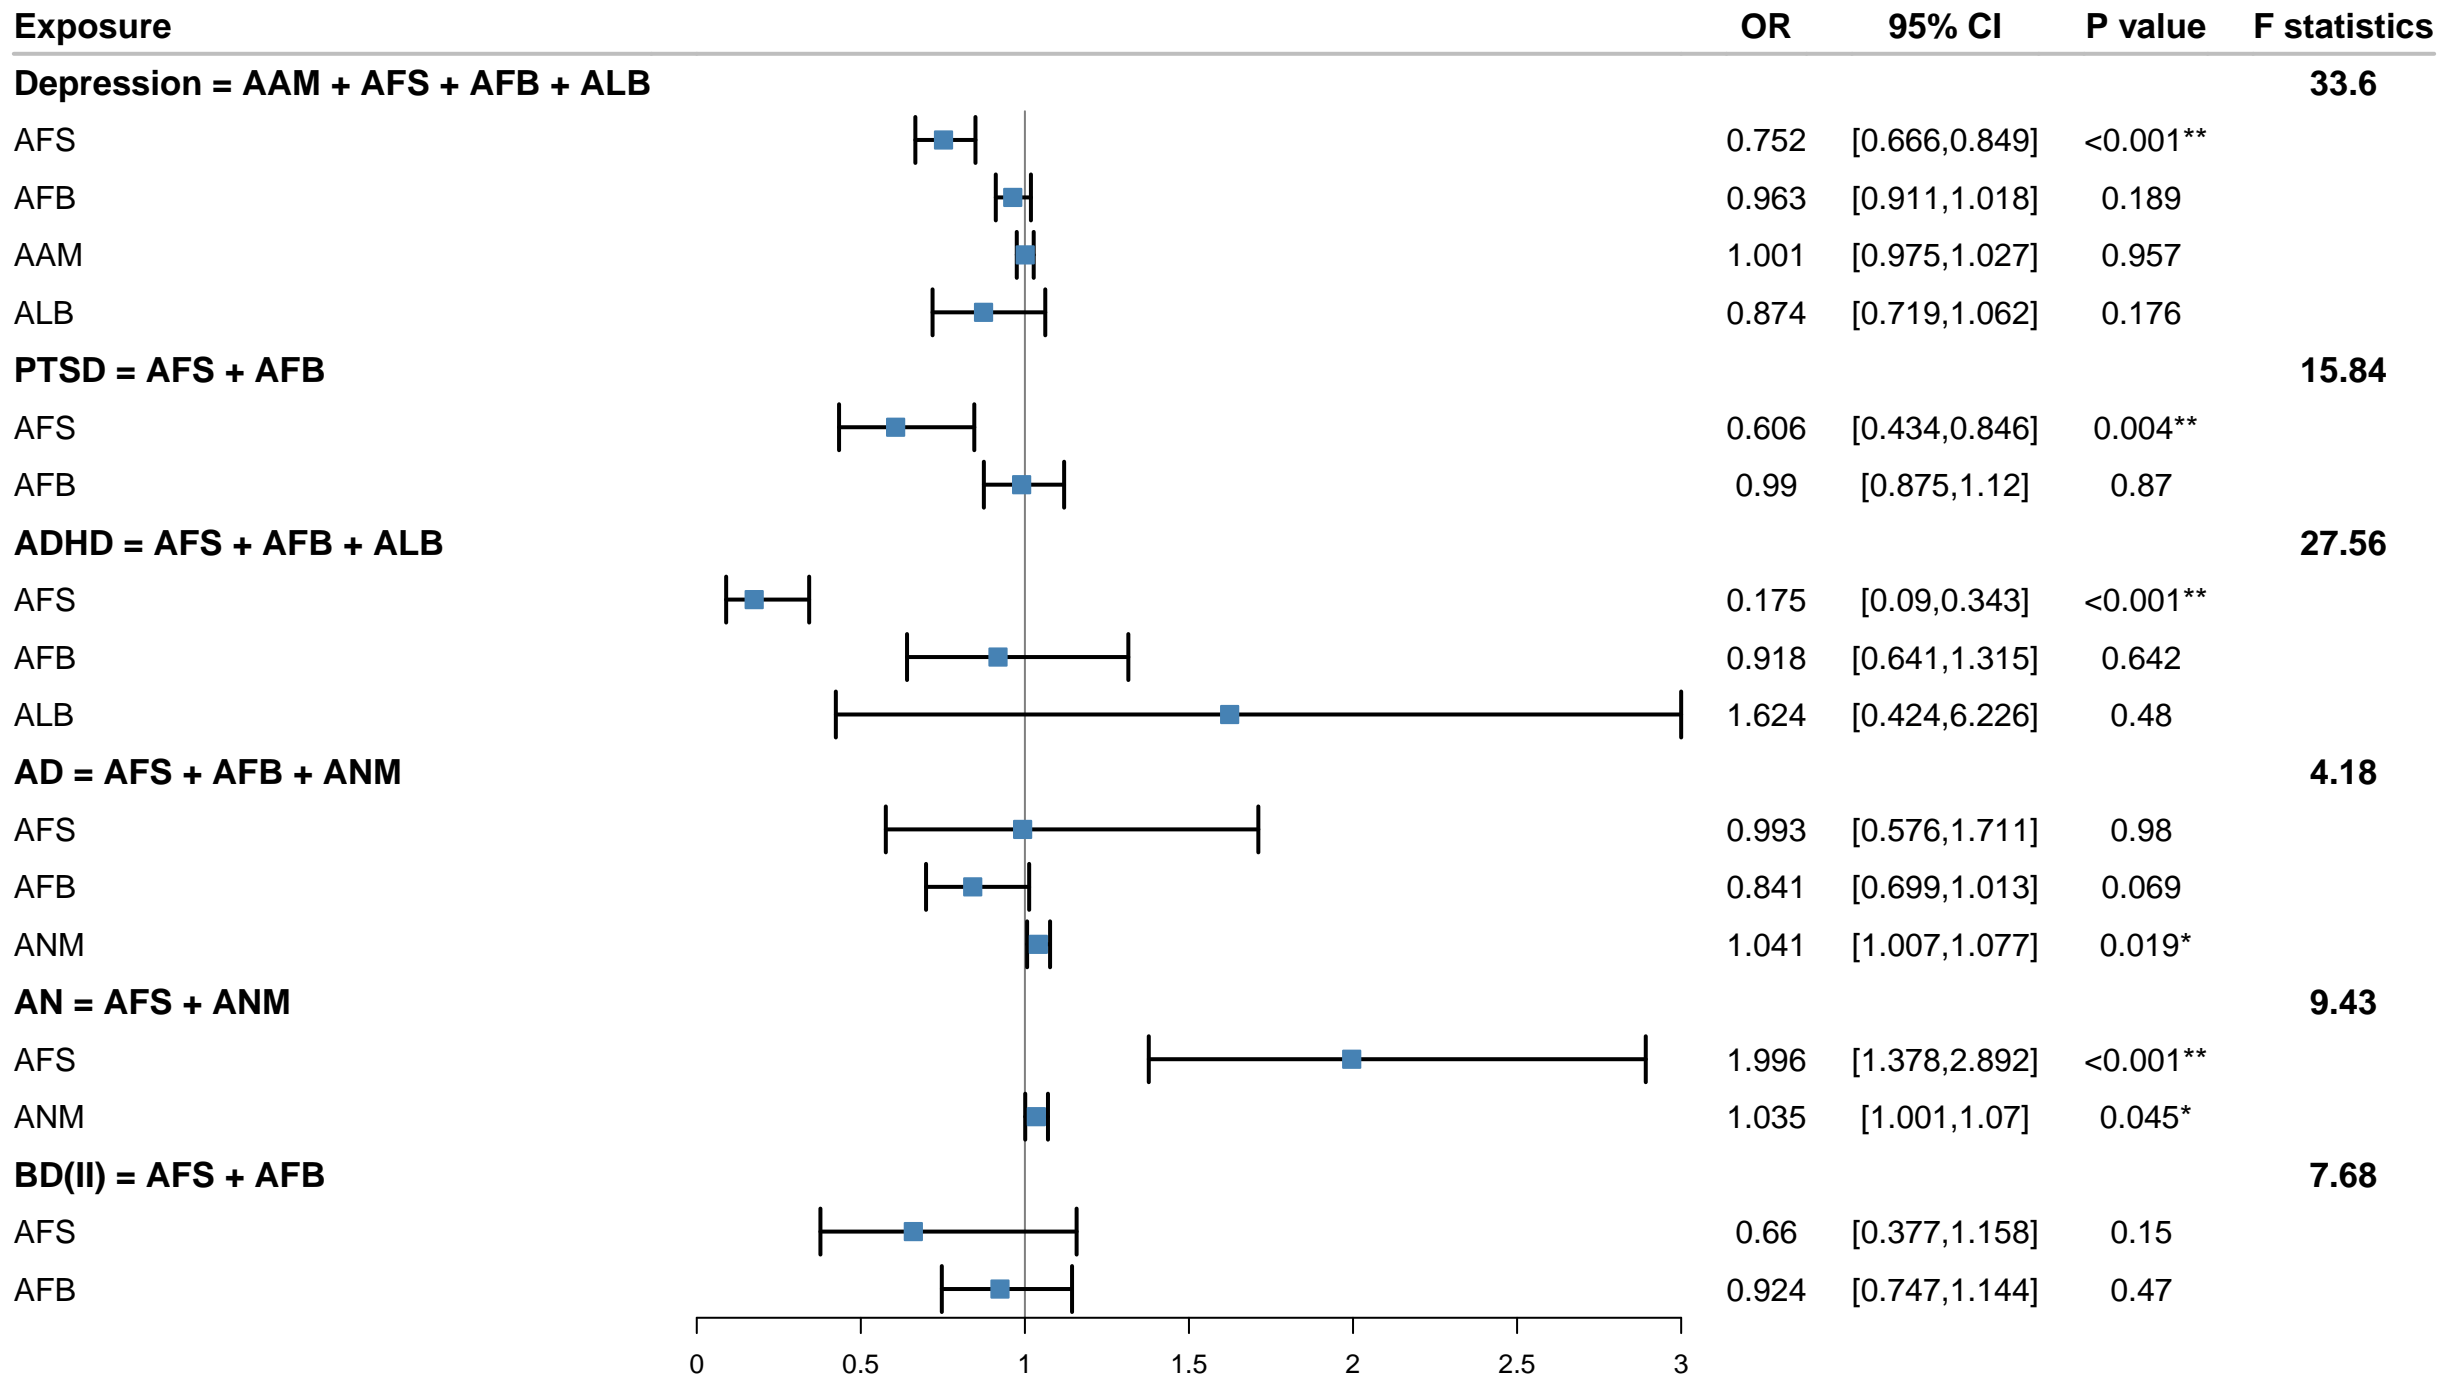

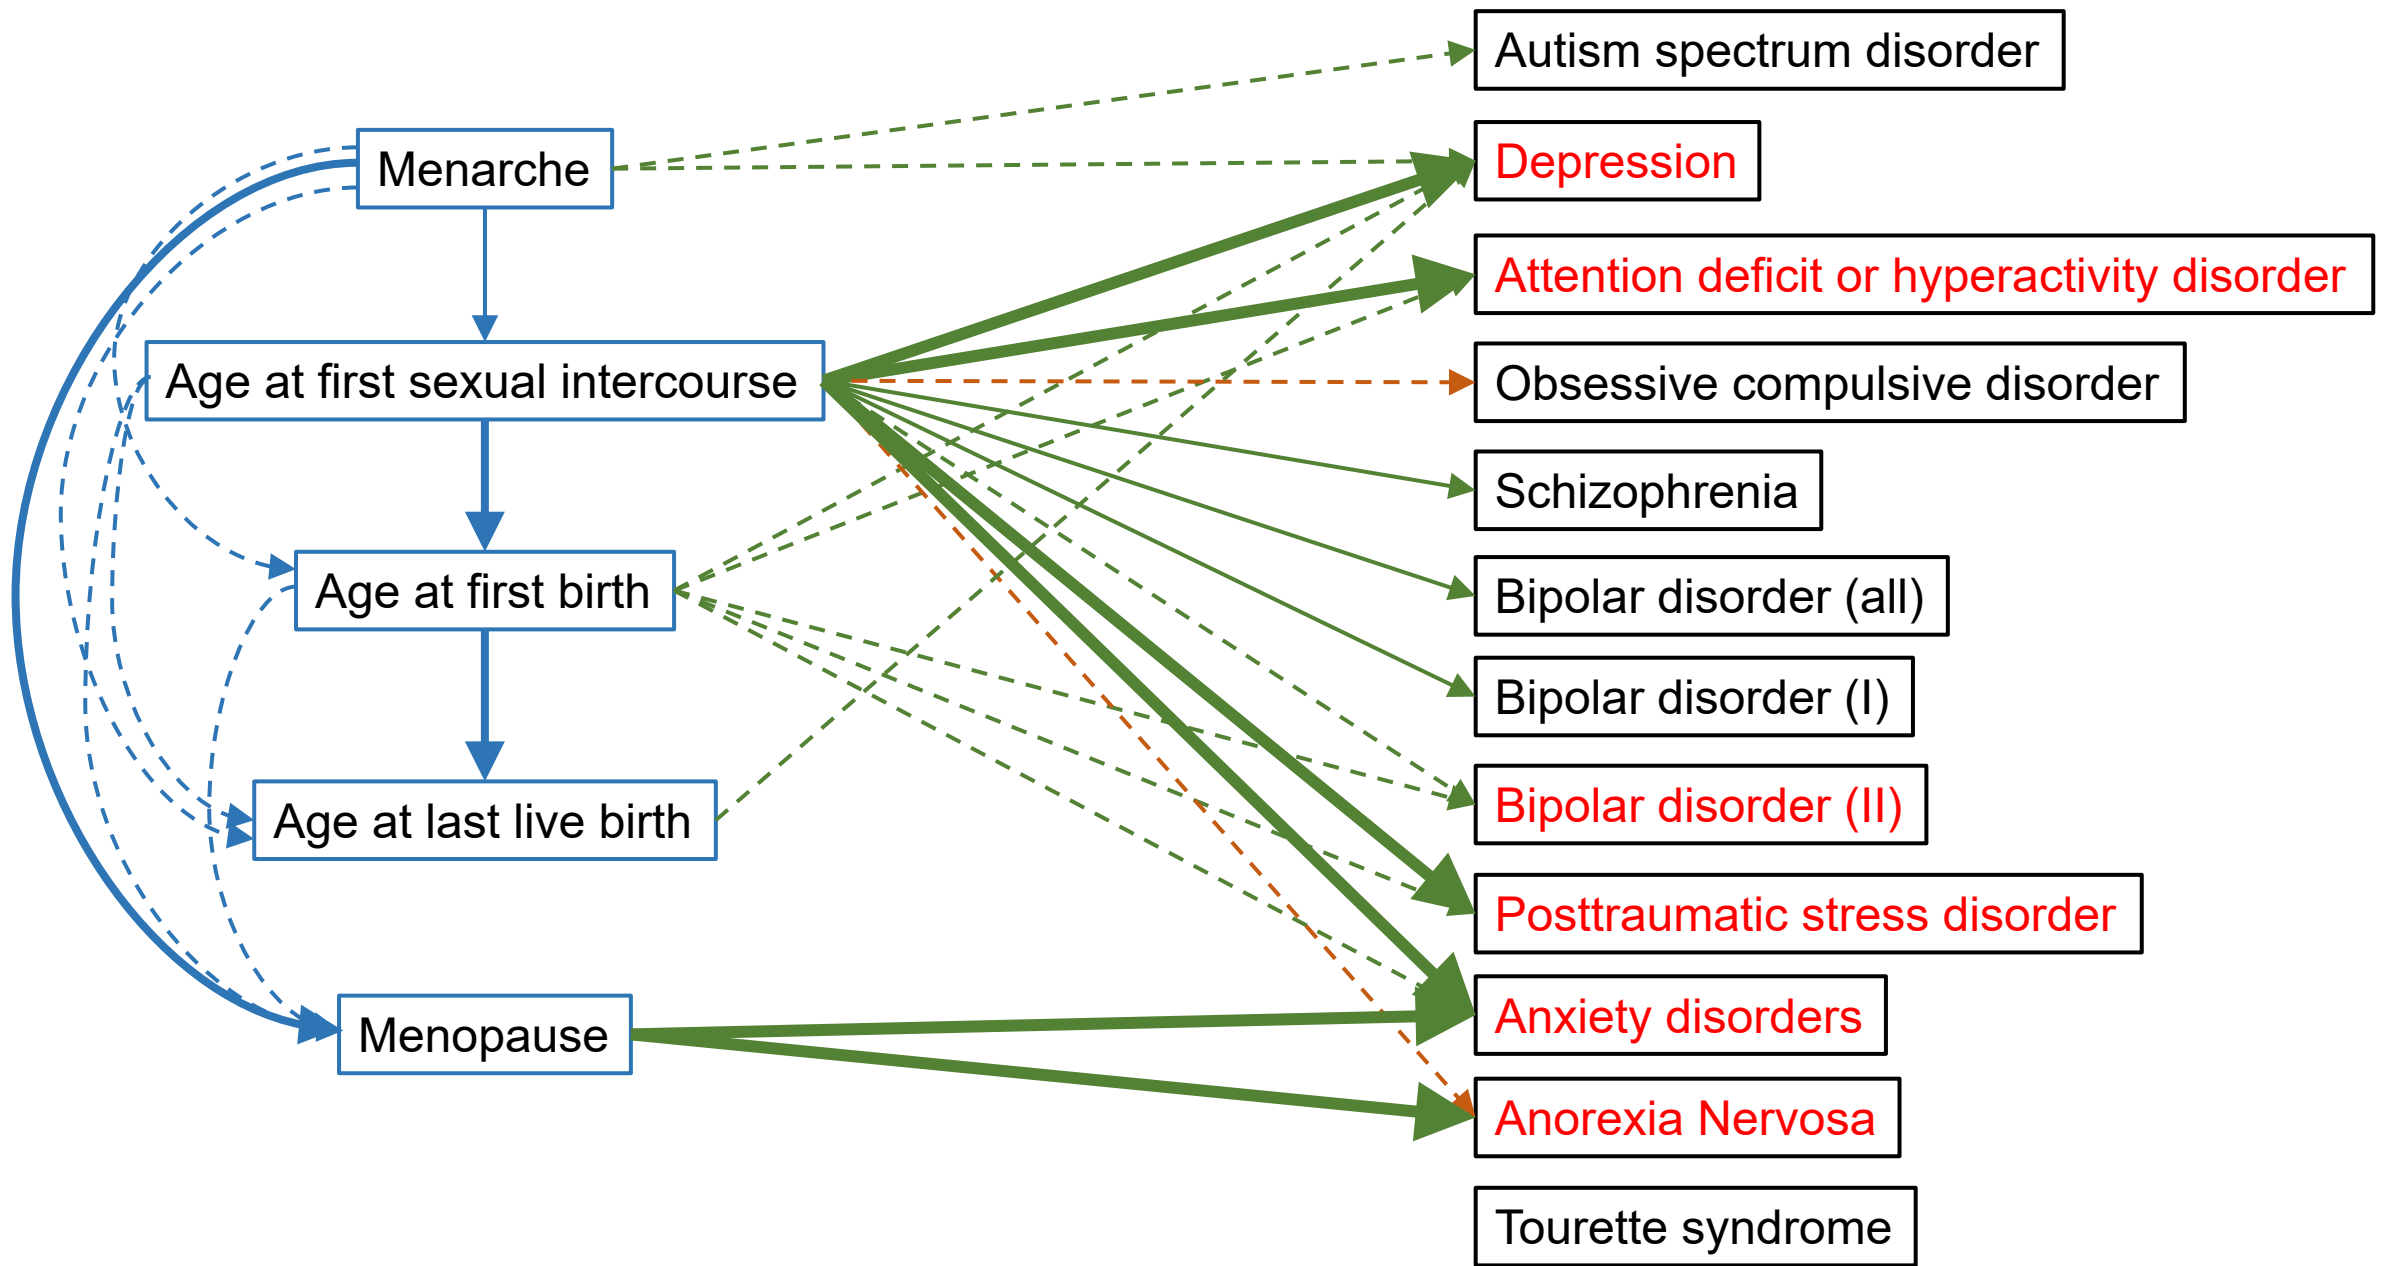

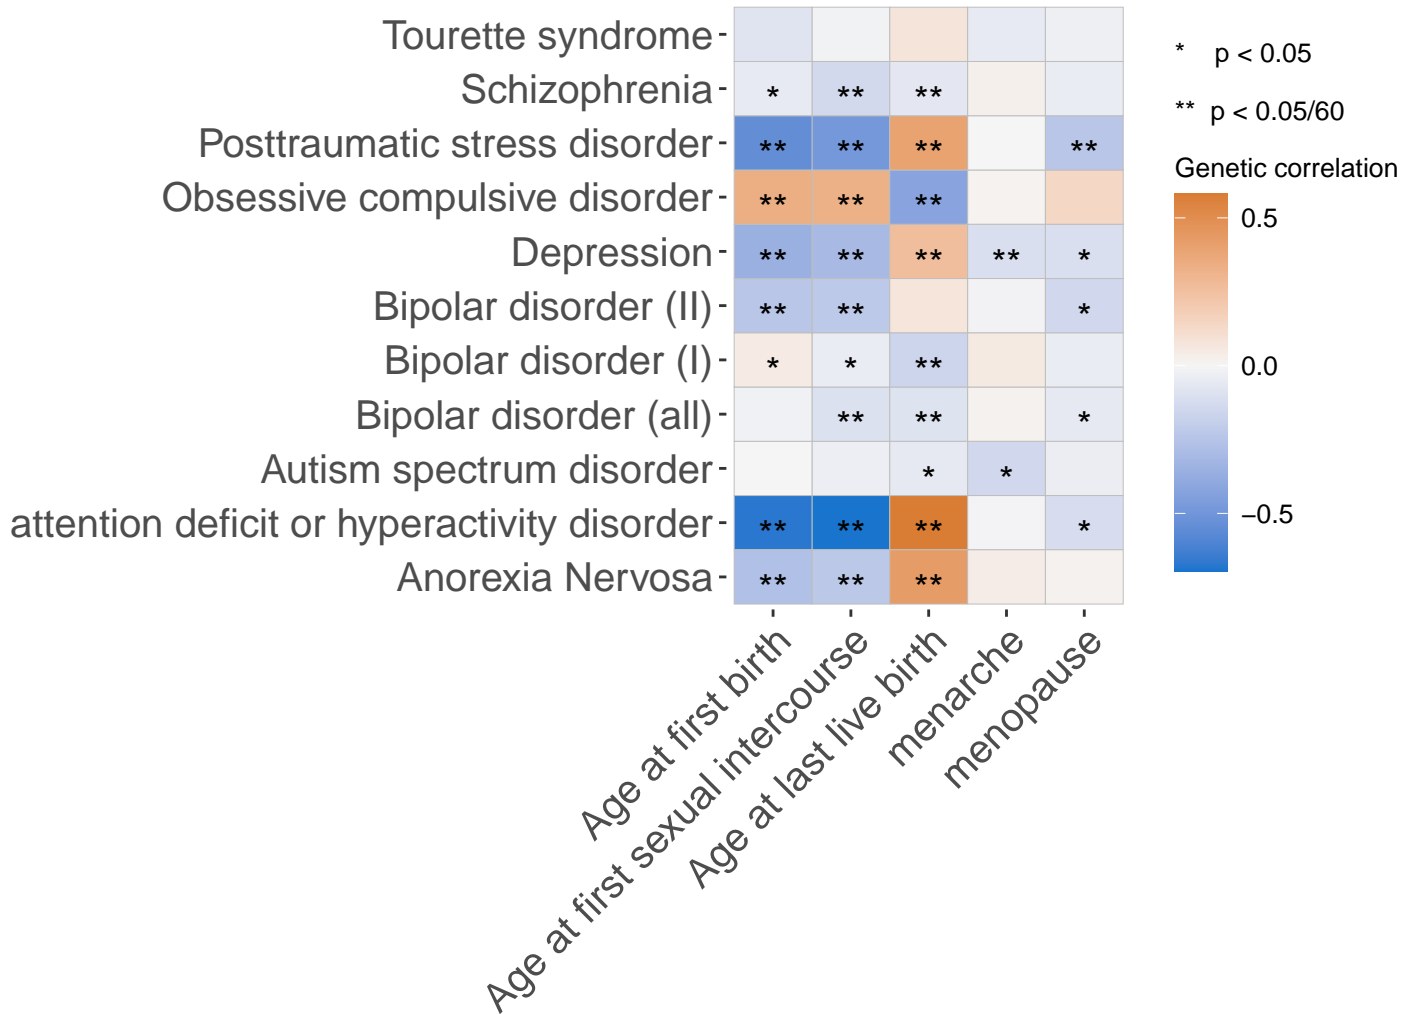

Outcome

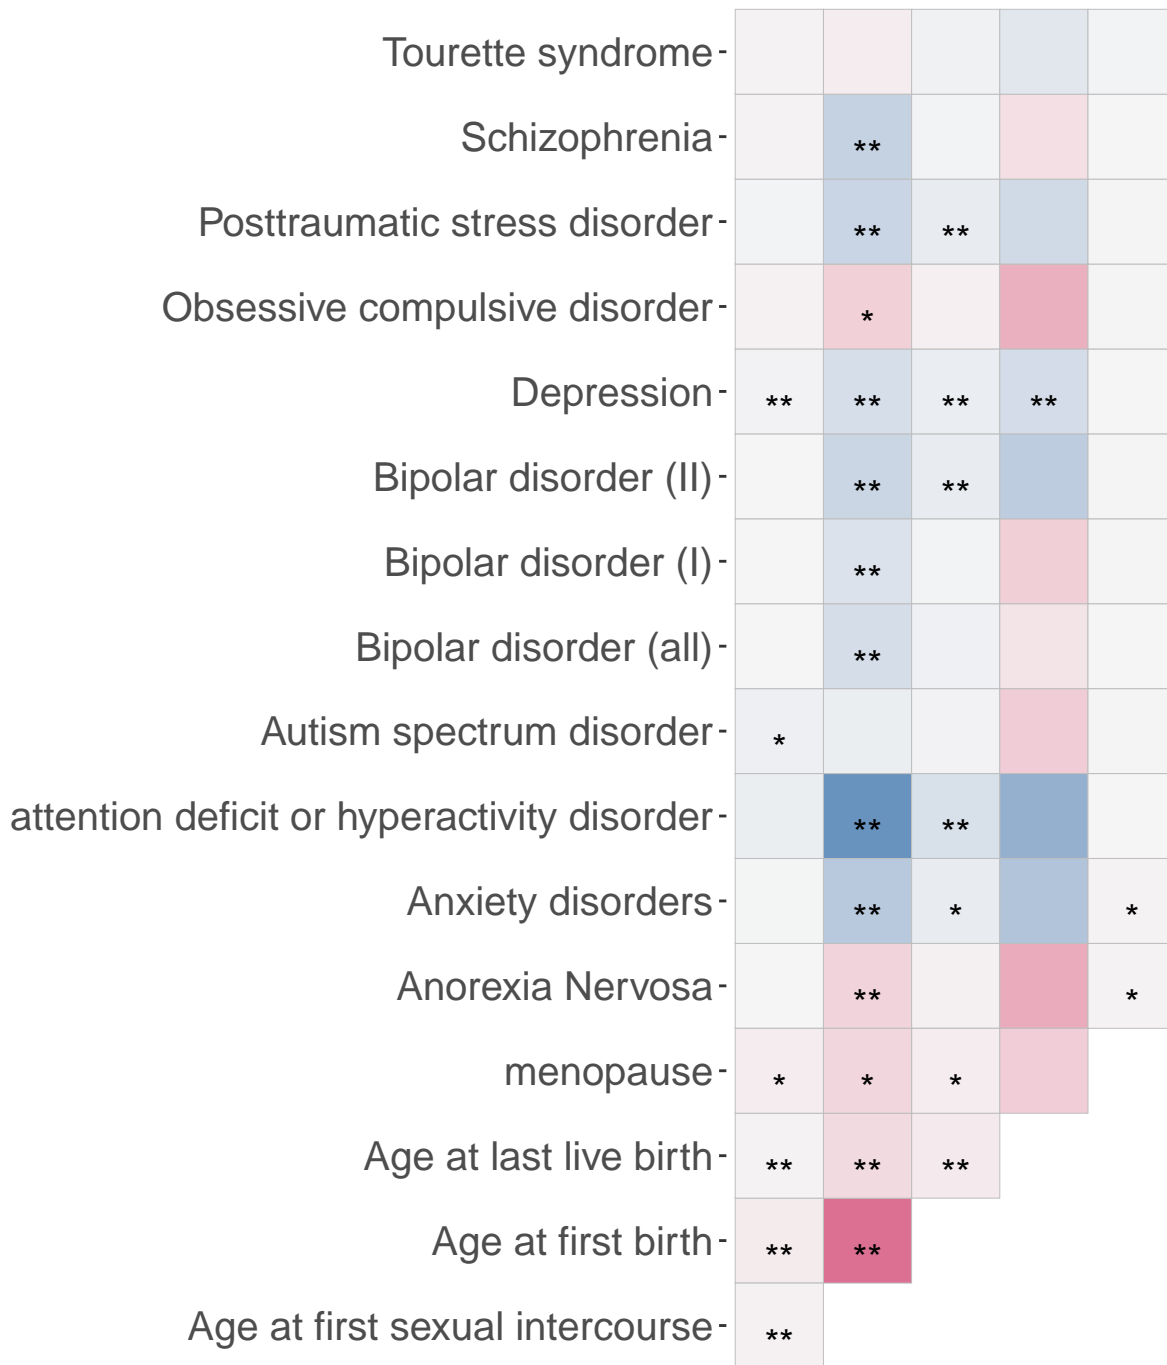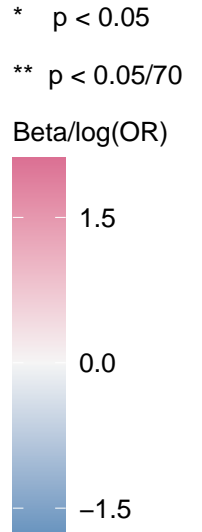

Exposure
